# Supplementary material
Source: publisher figshare collection journal article supplement (https://acs.figshare.com/ndownloader/files/4717630)
Supplement: Supplementary file 1 [file 4717630]

# Supporting Information

## Model Studies for the Mechanism of Heme Oxygenase-Catalyzed Porphyrin Meso Hydroxylation

Yaoqiu Zhu and Richard B. Silverman\*

*Contribution from the Department of Chemistry, Department of Biochemistry, Molecular  
Biology, and Cell Biology, and the Center for Drug Discovery and Chemical Biology,  
Northwestern University, Evanston, Illinois, 60208-3113*

### Table of Contents

|                                                                                   |    |
|-----------------------------------------------------------------------------------|----|
| General Methods and Reagents                                                      | S2 |
| $d_2$ -2,4-Diacetyldeuteroporphyrin Dimethyl Ester                                | S2 |
| Typical Iron Insertion Reaction                                                   | S3 |
| Coupled Oxidation of Ferric 2,4-Diacetyldeuteroporphyrin IX Dimethyl Ester        | S4 |
| Coupled Oxidation of Ferric $d_2$ -2,4-Diacetyldeuteroporphyrin IX Dimethyl Ester | S4 |

**General Methods and Reagents.** All NMR spectra were recorded on an Inova 500 spectrometer. Chemical shifts ( $\delta$ ) are reported downfield from tetramethylsilane ( $\text{Me}_4\text{Si}$ ) in parts per million (ppm). Mass spectra were recorded on a Micromass Quattro II atmospheric pressure ionization (API) triple quadrupole mass spectrometer.

Flash chromatography was performed with Merck silica gel (230-400 mesh). TLC plates (silica gel 60-F254) were purchased from VWR Scientific. 2,4-Diacetyldeuterioporphyrin dimethyl ester was either synthesized or purchased from Frontier Scientific, Inc. Sulfuric acid- $d_2$  and trifluoroacetic acid- $d$  were purchased from Acros Organic Co.  $\text{D}_2\text{O}$  was purchased from Sigma Chemical Co. Acids, bases, and conventional organic solvents were purchased from Fisher.

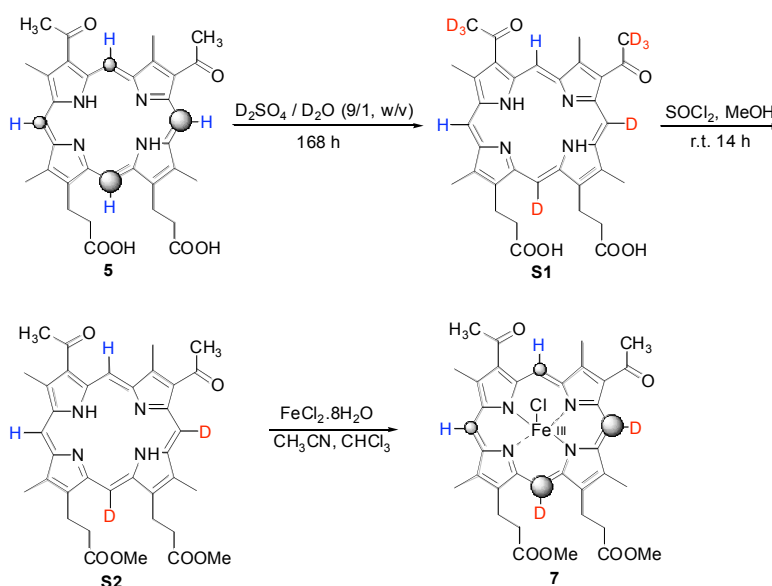

**Scheme S1.** Preparation of ferric  $d_2$ -2, 4-diacetyldeuterioporphyrin IX dimethyl ester (**6**).

**$d_2$ -2,4-Diacetyldeuterioporphyrin Dimethyl Ester (S2).** 2,4-Diacetyldeuterioporphyrin (**5**, 25 mg) was dissolved in 0.86 g of  $\text{D}_2\text{SO}_4/\text{D}_2\text{O}$  (9/1, w/v) mixture portionwise (Scheme S1). The deep-green mixture was stirred at room temperature for 7 days before being poured onto ice  $\text{H}_2\text{O}$  (20 mL) and extracted with 20 mL of



added and dissolved. The flask was cooled to 50 °C. Porphyrin dimethyl ester (100 mg) was dissolved in 12 mL of  $\text{CHCl}_3$  and was deaerated by  $\text{N}_2$  bubbling for 15 min. The porphyrin solution was transferred to the addition funnel and was added dropwise to the reaction flask. The temperature of the reaction flask was kept at 50 °C during the reaction. After addition was complete, the mixture was stirred under  $\text{N}_2$  for another 30 min before being diluted with 30 mL of  $\text{CH}_2\text{Cl}_2$ , washed with 0.2 M HCl,  $\text{H}_2\text{O}$ , and dried over anhydrous  $\text{Na}_2\text{SO}_4$ . After evaporation of the solvent, the residue was purified by silica gel chromatography ( $\text{MeOH}/\text{CH}_2\text{Cl}_2$ , 1/30). The fractions containing only the product were combined and evaporated to dryness. The residue was dissolved by 20 mL of  $\text{CH}_2\text{Cl}_2$  and washed with 0.2 M HCl and  $\text{H}_2\text{O}$  before being dried over anhydrous  $\text{Na}_2\text{SO}_4$ . After evaporation of the solvent, the ferric porphyrin dimethyl ester was obtained in 80-90% yield. Following this procedure, ferric 2,4-diacetyldeuteroporphyrin IX dimethyl ester (**7**) and ferric  $d_2$ -2, 4-diacetyldeuteroporphyrin IX dimethyl ester (**6**) were obtained. MS analysis: **7**,  $[\text{C}_{36}\text{H}_{36}\text{N}_4\text{O}_6\text{Fe}]^+$ : calcd 676.2, found 676.6; **6**,  $[\text{C}_{36}\text{H}_{34}\text{D}_2\text{O}_8\text{N}_4\text{Fe}]^+$ : calcd 678.2, found 678.5.

**Coupled Oxidation of Ferric 2,4-Diacetyldeuteroporphyrin IX Dimethyl Ester (**7**).** Purified ferric 2,4-diacetyldeuteroporphyrin IX dimethyl ester (**7**, 10 mg) was dissolved in 200 mL of pyridine and 50 mL of  $\text{H}_2\text{O}$ . The mixture was bubbled with oxygen vigorously for 10 min before a solution of 500 mg of ascorbate in 1 mL of  $\text{H}_2\text{O}$  was added. The flask was then stoppered and shaken for 5 min. The yellowish green solution was diluted with  $\text{H}_2\text{O}$  and extracted with  $\text{CH}_2\text{Cl}_2$  (3 x 50 mL). After being dried over  $\text{Na}_2\text{SO}_4$  and evaporation of most of the solvents, verdoheme **8** was diluted with  $\text{CH}_2\text{Cl}_2$  and analyzed by mass spectroscopy.  $[\text{C}_{35}\text{H}_{35}\text{O}_7\text{N}_4\text{Fe}]^+$ : calcd 679.2, found 679.6. The mass spectra in this control reaction are shown in Figure S2.

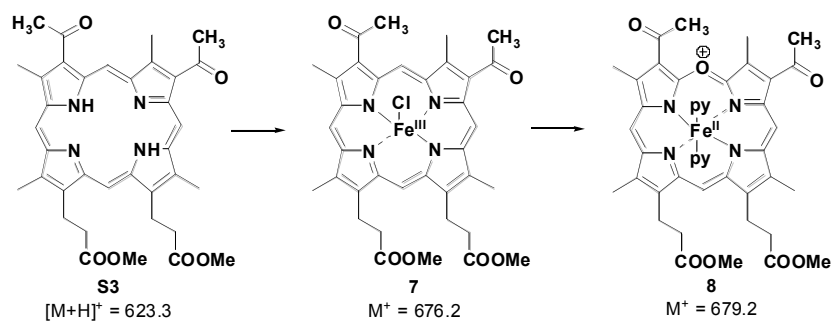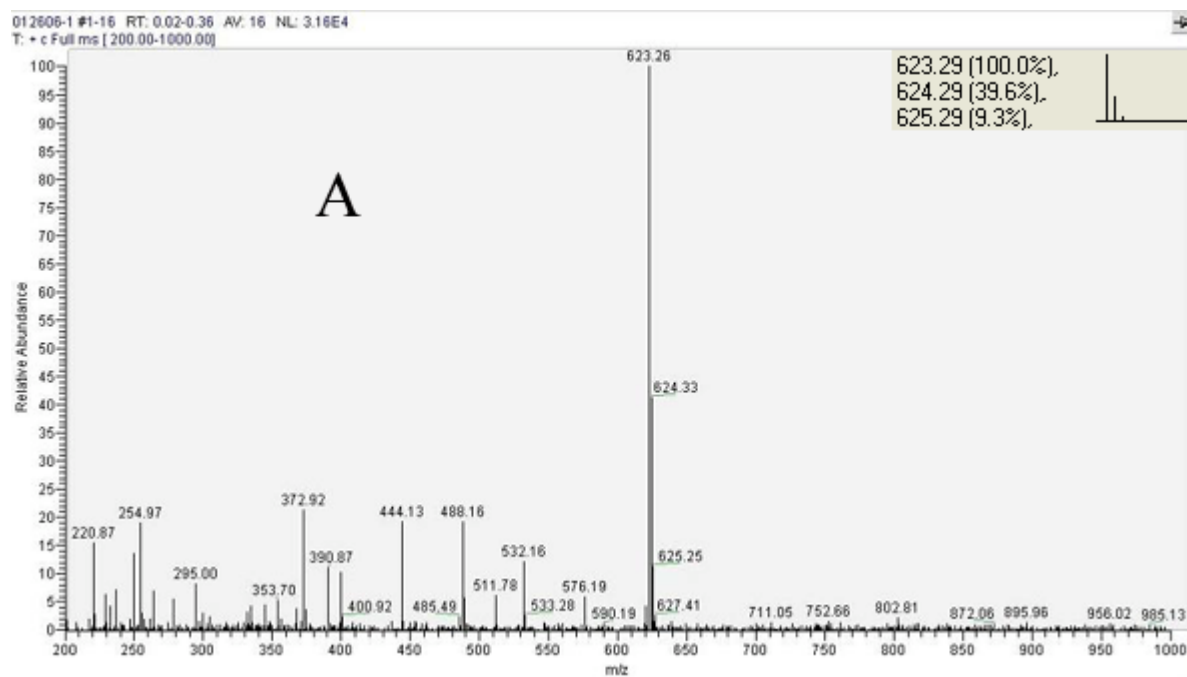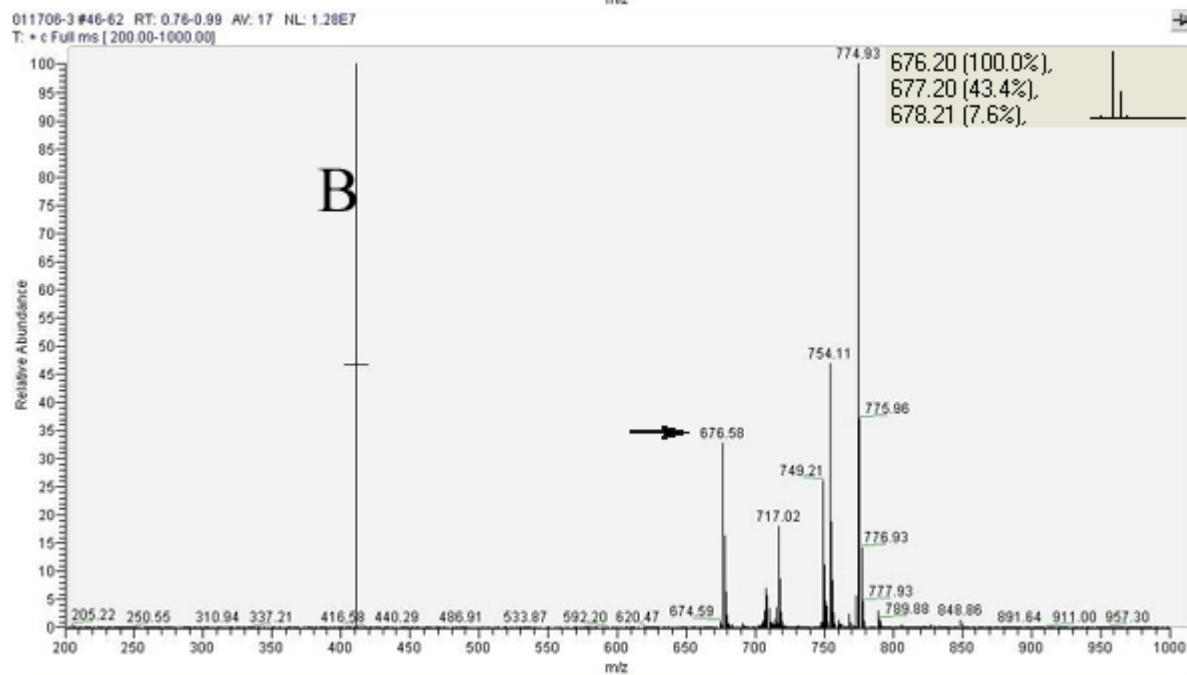

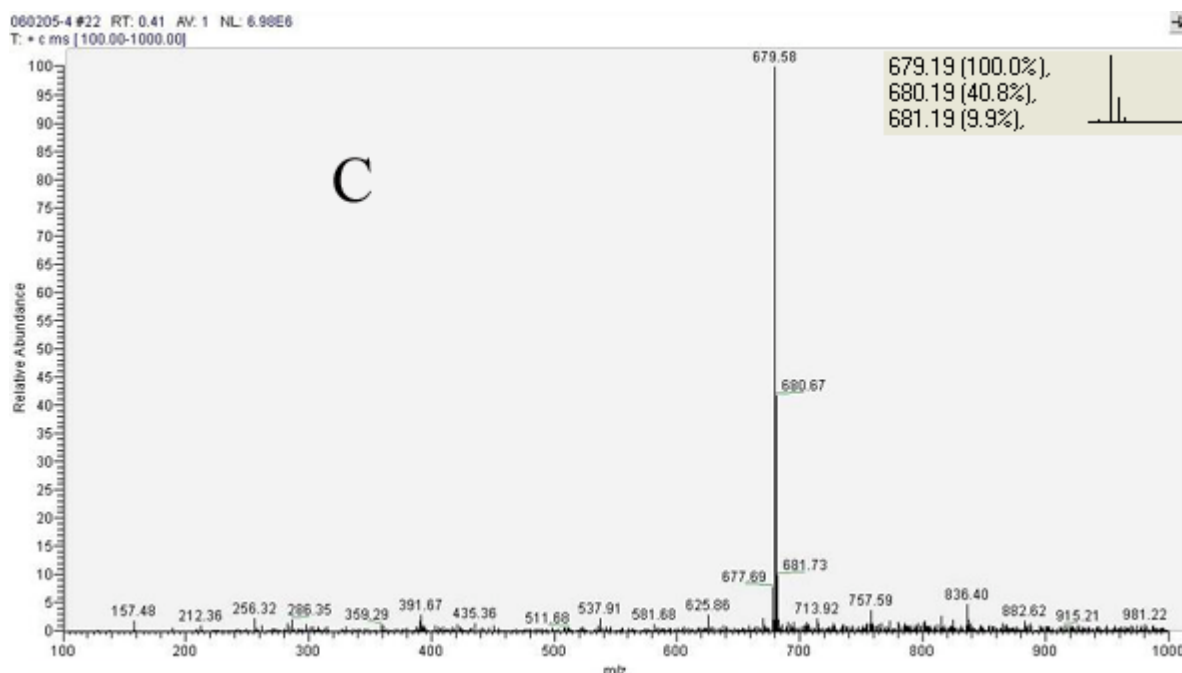

**Figure S2.** Mass spectrum analysis in the control reaction with non-deuterated porphyrin (A: S3; B: 7; C: 8). The inserted pictures are the simulation diagrams of the isotopic pattern as calculated by Chemdraw.

**Coupled Oxidation of Ferric  $d_2$ -2,4-Diacetyldeuteroporphyrin IX Dimethyl Ester (6).** Purified ferric  $d_2$ -2,4-diacetyldeuteroporphyrin IX dimethyl ester (**6**, 10 mg) was subjected to the coupled oxidation conditions as described above. The verdoheme product was diluted with  $\text{CH}_2\text{Cl}_2$  and analyzed by mass spectroscopy to be **9**:  $[\text{C}_{35}\text{H}_{34}\text{DO}_7\text{N}_4\text{Fe}]^+$ : caled 680.2, found 680.7.

The mass spectra in this experiment are shown in Figure S3. The relative intensity of the “ $(\text{M}+\text{H}^+)+1$ ” peaks in Spectra D are ~80% of the “ $\text{M}+\text{H}^+$ ” peak, which is higher than the calculated value based on di-deuteration (40%). This indicates that after the  $\beta$ - and  $\gamma$ -*meso* positions get fully deuterated after 7-day reaction, some other positions in compound S2 also get slightly deuterated. This deuteration pattern was kept very consistent in the spectra of compound **6** and compound **9**. One D-atom loss was clearly demonstrated in this experiment, which supports an electrophilic aromatic substitution mechanism.

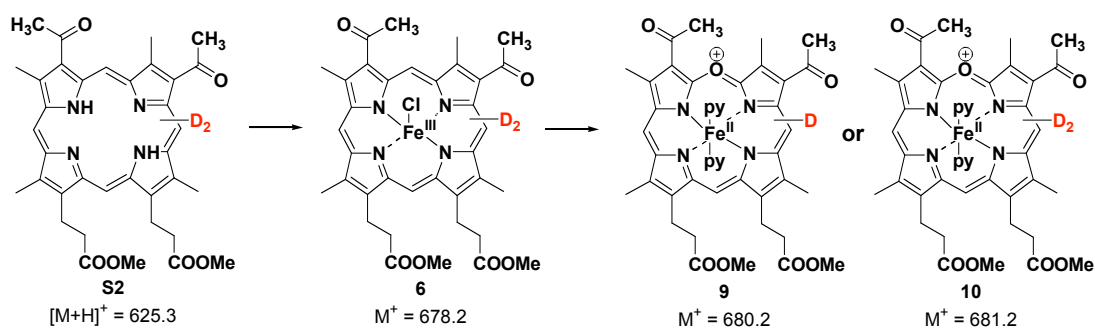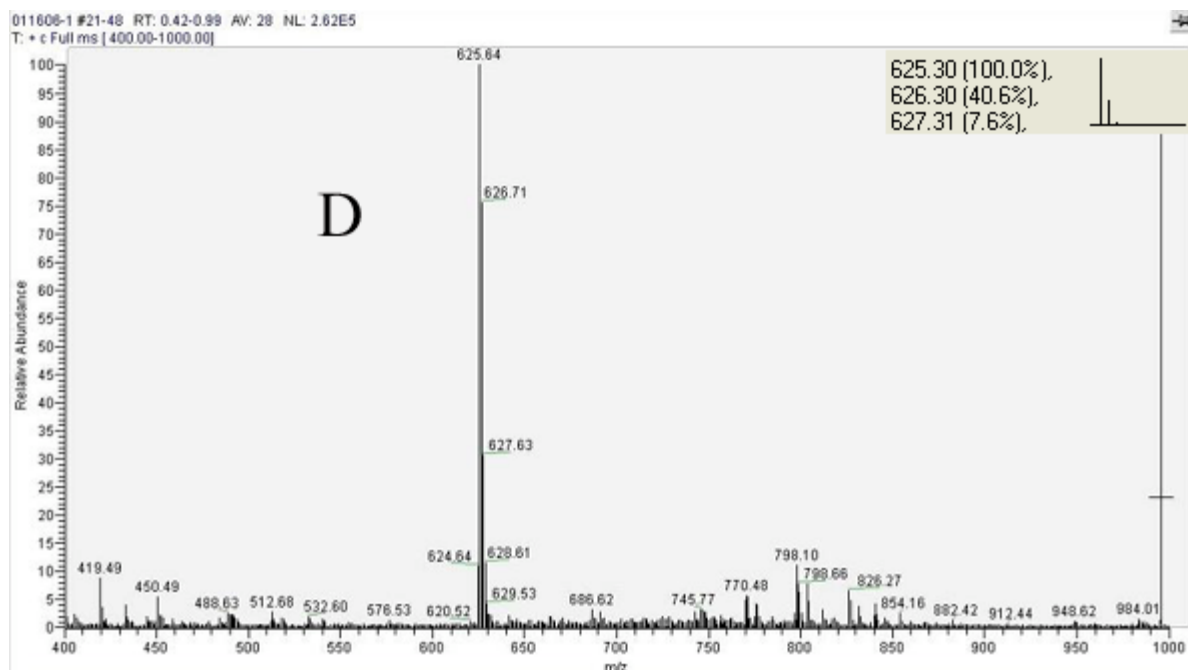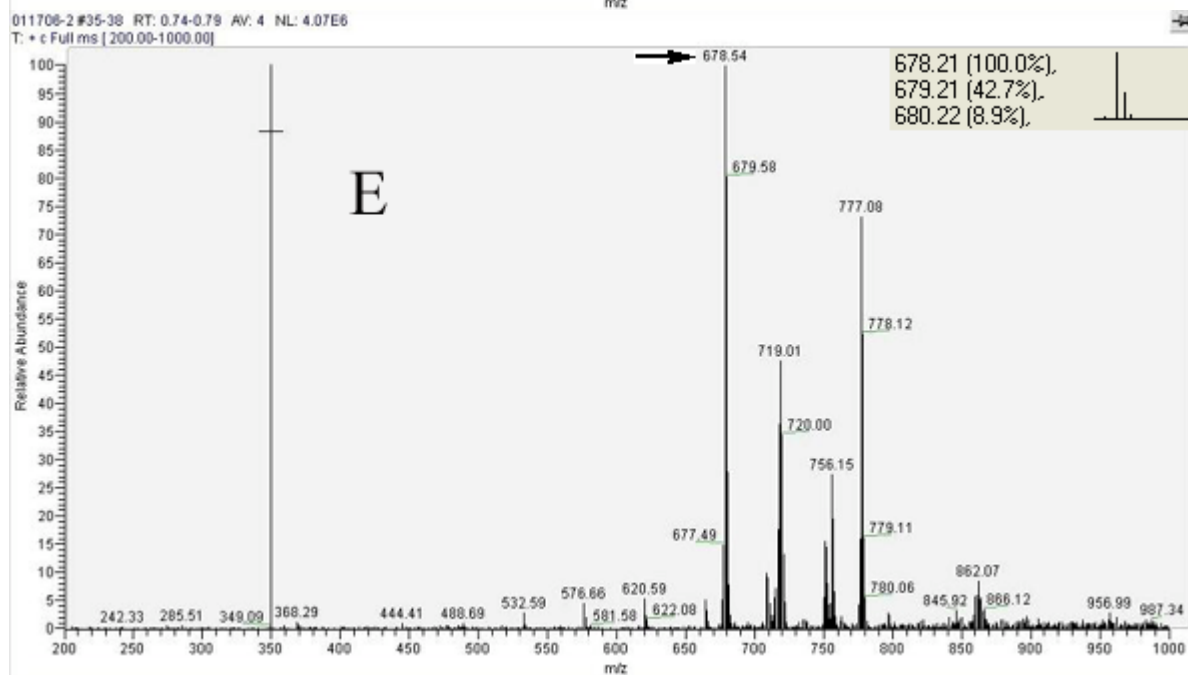

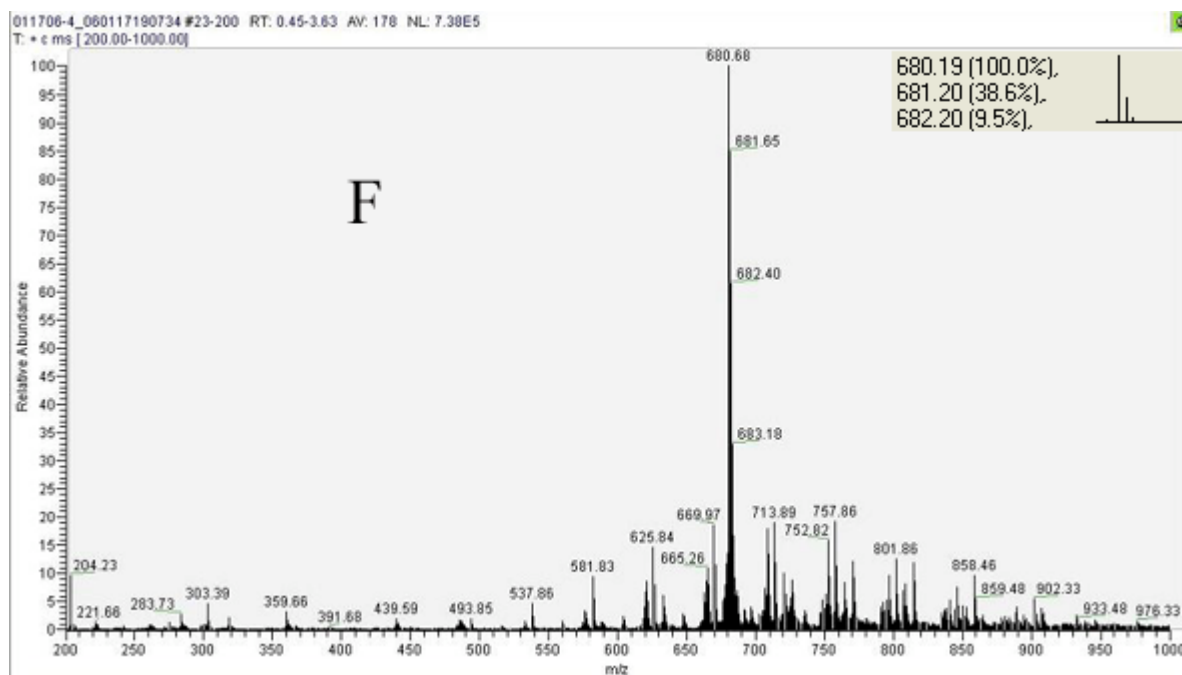

**Figure S3.** Mass spectrum analysis in the experiment with deuterated porphyrin (D: S2; E: 6; F: 9). The inserted pictures are the simulation diagrams of the isotopic pattern as calculated by Chemdraw.
